# Supplementary material for: Ntf3 acts downstream of Sip1 in cortical postmitotic neurons to control progenitor cell fate through feedback signaling
Source: Oxford University Press journal article supplement (doi:10.1242/dev.114173), 2014-08-02
Supplement: dev114173_supp.pdf [file dev114173_supp.pdf]

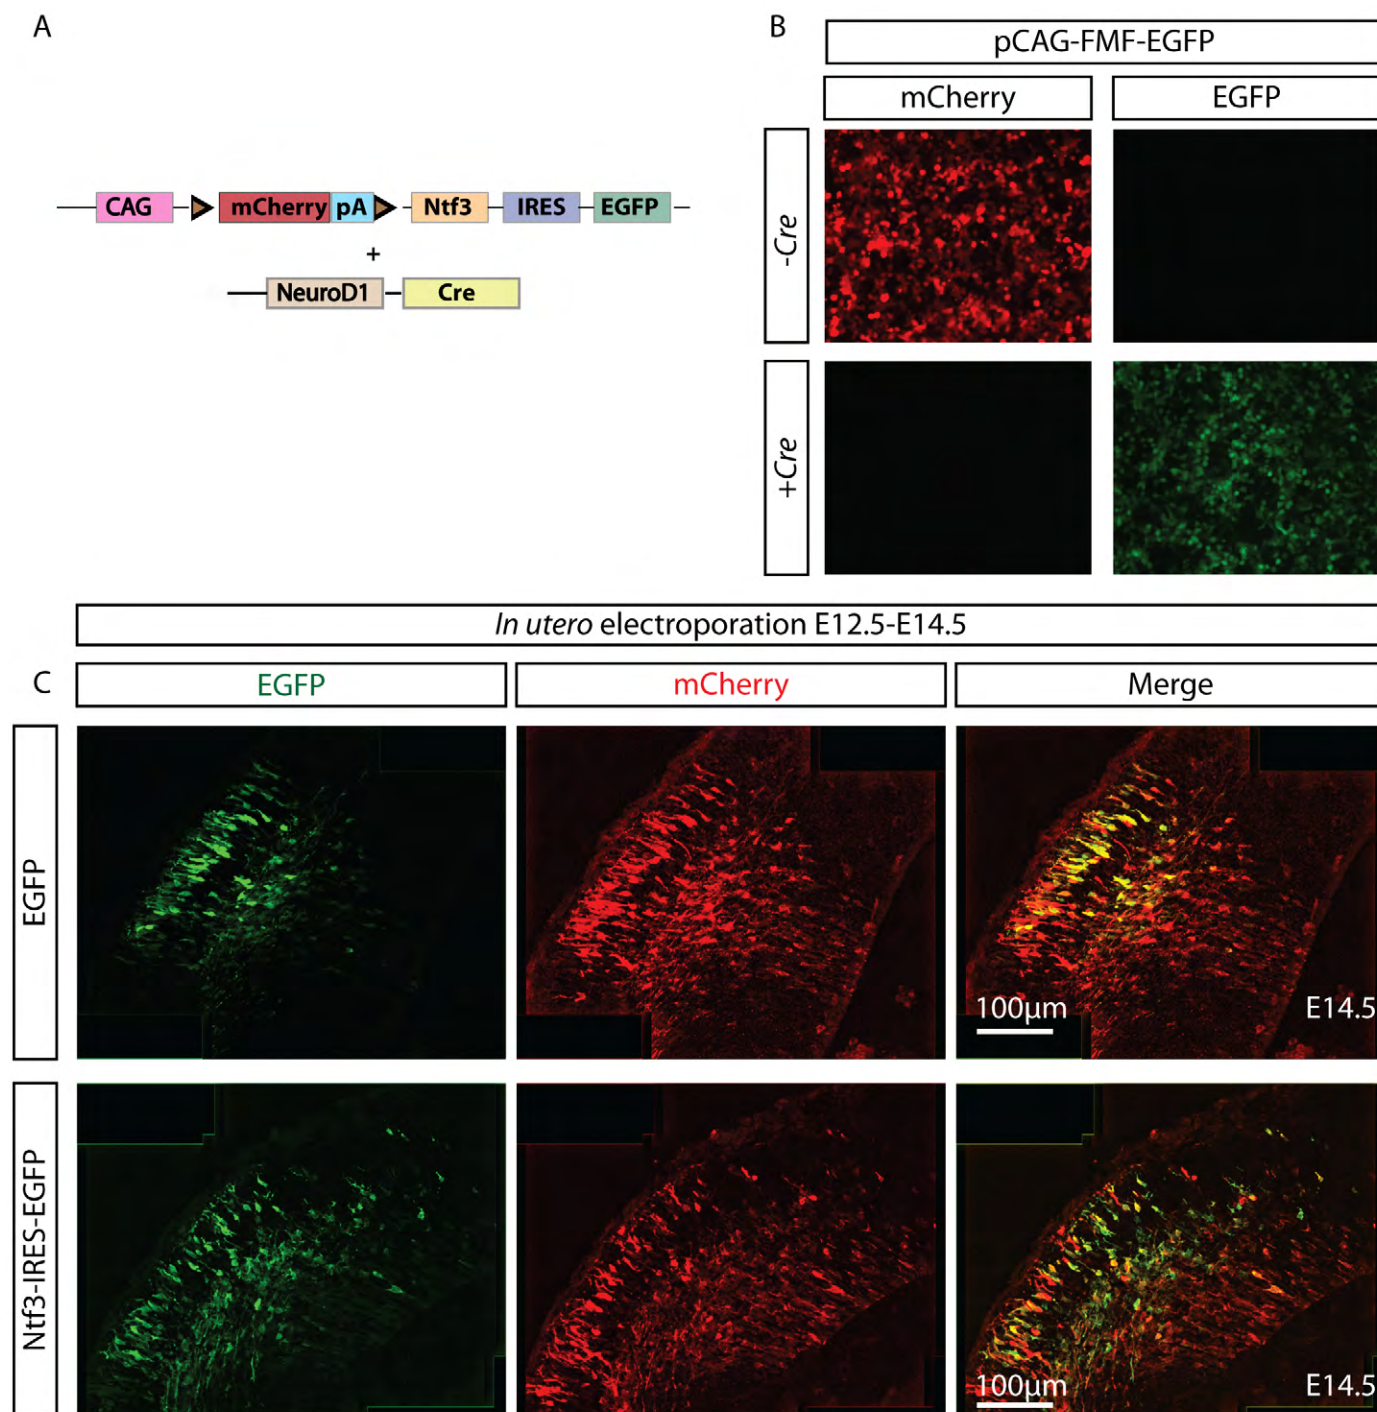

**Fig. S1. Validation of plasmid system used for postmitotic expression.** (A) Design of the plasmid system used. (B) Validation in HEK293T cells using CAG-Cre shows that all cells express mCherry before and EGFP after recombination. (C) Only mCherry is expressed in the germinal zone, while expression switches to EGFP after NeuroD1 promoter-driven Cre-mediated recombination.

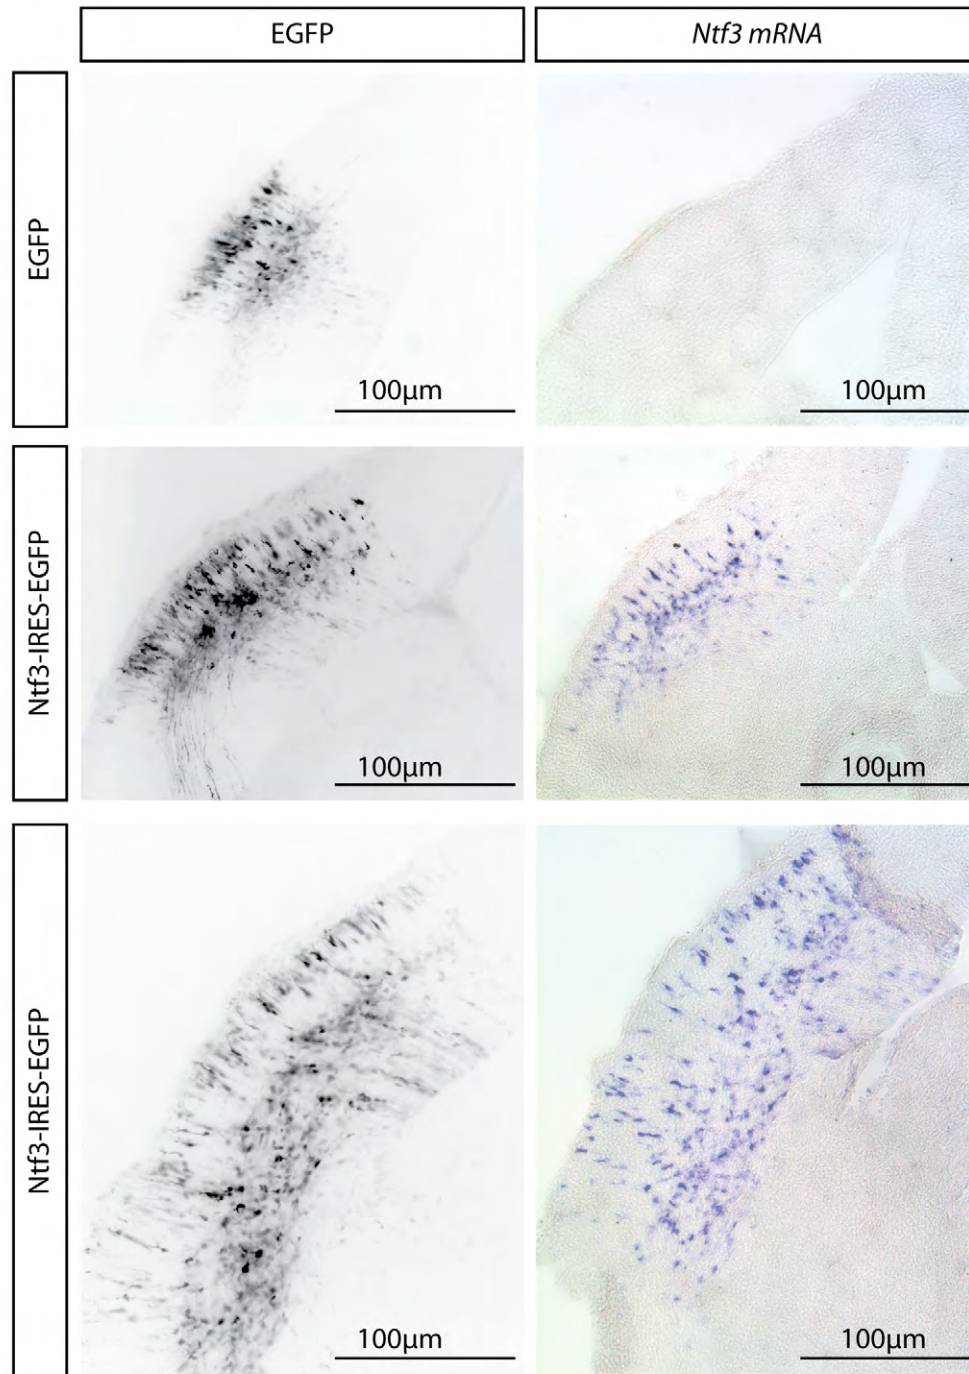

**Fig. S2. Validation of *Ntf3* expression.** Postmitotic expression of *Ntf3* was validated using *in situ* hybridization. No *Ntf3* expression can be seen in the control brains.
